# Supplementary material
Source: PubMed Central journal article supplement (PMC3025487)
Supplement: NIHMS260149-supplement-01.pdf [file NIHMS260149-supplement-01.pdf]

## Supplemental Information

## Steroid Hormone Inactivation Is Required

during the Juvenile-Adult Transition in *Drosophila*

Kim F. Rewitz, Naoki Yamanaka, and Michael B. O'Connor

Table S1. Overexpression of *UAS-Cyp18a1* using different Gal4 drivers, related to figure 1.

| Gal4 driver      | Expression pattern              | n   | Lethal phase (% dead animals) |       |      |
|------------------|---------------------------------|-----|-------------------------------|-------|------|
|                  |                                 |     | Embryo                        | Larva | Pupa |
| <i>da-Gal4</i>   | Ubiquitous (strong)             | 200 | 100                           |       |      |
| <i>arm-Gal4</i>  | Ubiquitous (weak)               | 100 | 100                           |       |      |
| <i>ppl-Gal4</i>  | Fat body, gut, salivary glands  | 50  | n.d.                          | 100   |      |
| <i>CG-Gal4</i>   | Fat body                        | 50  | n.d.                          | 46    | 54   |
| <i>elav-Gal4</i> | Post-mitotic neurons            | 140 | 99                            | 1     |      |
| <i>Y45-Gal4</i>  | Epidermis, gut, salivary glands | 100 | 100                           |       |      |

Transgenic flies carrying *UAS-Cyp18a1* were crossed to flies with different *Gal4* insertions to overexpress Cyp18a1.

Table S2. Pupal lethality of *Cyp18a1* RNAi using different Gal4 drivers, related to figure 2.

| Gal4 driver         | Expression pattern  | n       | % eclosed adults |
|---------------------|---------------------|---------|------------------|
|                     |                     | (pupae) |                  |
| <i>αTub84B-Gal4</i> | Ubiquitous (strong) | 50      | 0                |
| <i>Act5C-Gal4</i>   | Ubiquitous (strong) | 50      | 6                |
| <i>arm-Gal4</i>     | Ubiquitous (weak)   | 50      | 68               |

Transgenic flies carrying *UAS-Cyp18a1-RNAi* were crossed to flies with different *Gal4* insertions to knock down expression of *Cyp18a1*.

## Supplemental Experimental Procedures

**Table S3. Primers used for quantitative PCR**

Fwd:Q $\beta$ FTZ-F1      AATCAGCAGCACCACAGCA  
Rev:Q $\beta$ FTZ-F1      TTGGCATTGTTGGCGATATT  
(Detects only the  *$\beta$ FTZ-F1* isoform)

Fwd:QE74              GCCGGACATGAACTACGAGA  
Rev:QE74              CTTGGGCACATCCACGAAC  
(Detects both the *E74A* and *E74B* isoforms)

Fwd:QE75A            ACCACAGCACCACCCATTT  
Rev:QE75A            TGTTTGGCGGTAGTTTCAGG  
(Detects only the *E75A* isoform)

Fwd:QE75B            CAACAGCAACAACCCAGA  
Rev:QE75B            CAGATCGGCACATGGCTTT  
(Detects only the *E75B* isoform)

Fwd:QBr                CTCAACACGCACACCCAAT  
Rev:QBr                GCTGAAGAGGGTTCGAGGAG  
(Detects all *br* isoforms)

Fwd:QE $c$ R              TGCGAAGAAGAGCAAGAAGG  
Rev:QE $c$ R              CAGGTGAGGGCGTTGTAGTG  
(Detects all *EcR* isoforms)

Fwd:QDHR3            TGGACCGTGTTAATCGCAAC  
Rev:QDHR3            ACCTCGTCCTCGACCTTCTC  
(Detects all *DHR3* isoforms)

Fwd:QBlimp1          GCGAACAGGAAATGACCAGA  
Rev:QBlimp1          GGCTCCCAGATAAGCAGCA

Fwd:QCYP18          TATTCATGGGCAGCGAGAAG  
Rev:QCYP18          CCCAGTCGTGTGGAGAACA
